# Supplementary material for: Functional characterization of barley betaglucanless mutants demonstrates a unique role for CslF6 in (1,3;1,4)-β-D-glucan biosynthesis
Source: PubMed Central journal article supplement — J Exp Bot. 2011 Sep 21;63(1):381–92. doi: 10.1093/jxb/err285 (PMC3245474; doi:10.1093/jxb/err285), 2011-09-21
Supplement: supp_err285_00065896_file001.pdf [file supp_err285_00065896_file001.pdf]

**Functional characterisation of barley betaglucanless mutants demonstrates a unique role  
for CslF6 in (1,3;1,4)- $\beta$ -D-glucan biosynthesis**

Shin Taketa, Takahisa Yuo, Takuji Tonooka, Yoichi Tsumuraya, Yoshiaki Inagaki, Naoto  
Haruyama, Oscar Larroque and Stephen A. Jobling

Supplementary material

**Figure S1.** Molecular mapping of the *bgl* and *HvCslF6* genes on chromosome 7H using 104 F<sub>2</sub> plants from a cross between ‘Bowman’ and OUM125. The black box indicates the centromere position.

**Figure S2.** Quantitative RT-PCR analysis of expression of the *HvCslF6* gene in various tissues and developmental stages. DAF: days after flowering. Bars indicate standard deviations.

**Figure S3.** Alignments of seven barley HvCslF proteins and rice OsCslF6 protein. The mutated amino acids in three *bgl* mutants (positions 253, 638 and 660) are highly conserved as highlighted in colour. The amino acids at position 590, which were mutated in some barley germplasm accessions, are not conserved.

**Figure S4.** Difference in appearance of leaf tip between wild type barley (‘Akashinriki’) and *HvCslF6* mutant OUM125. Images were taken from the upper leaves of plants which were heading.

**Figure S5.** FACE analysis of lichenase digests of cell wall extracts from various barley seedling tissues of ‘Akashinriki’ (shown in blue line) and OUM125 (shown in red line) demonstrating the absence DP3 and DP4 peaks characteristic of (1,3;1,4)- $\beta$ -D-glucan in all tissues of the mutant.

**Figure S6.** Content of (1,3;1,4)-  $\beta$ -D-glucan in leaves of three sets of isogenic lines. Error bars represent the standard errors in three replications. \*\*: significant at the 1% level by *t*-test.

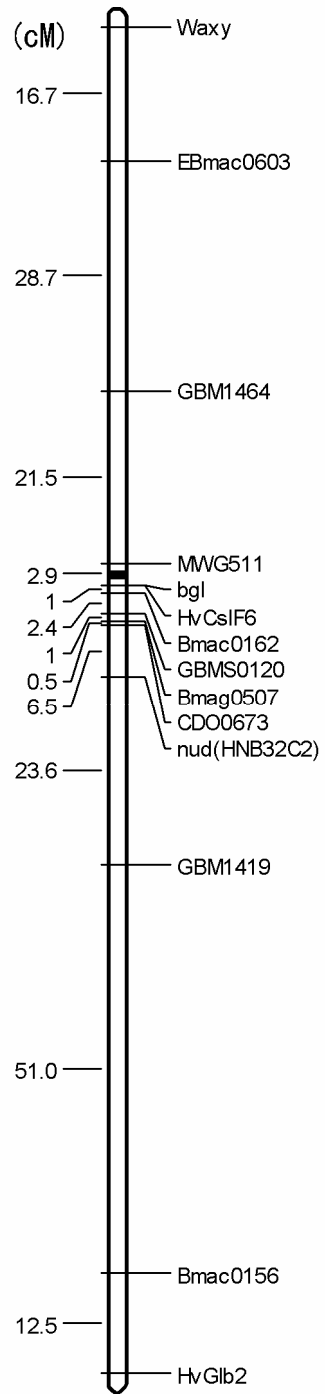

Fig. S1

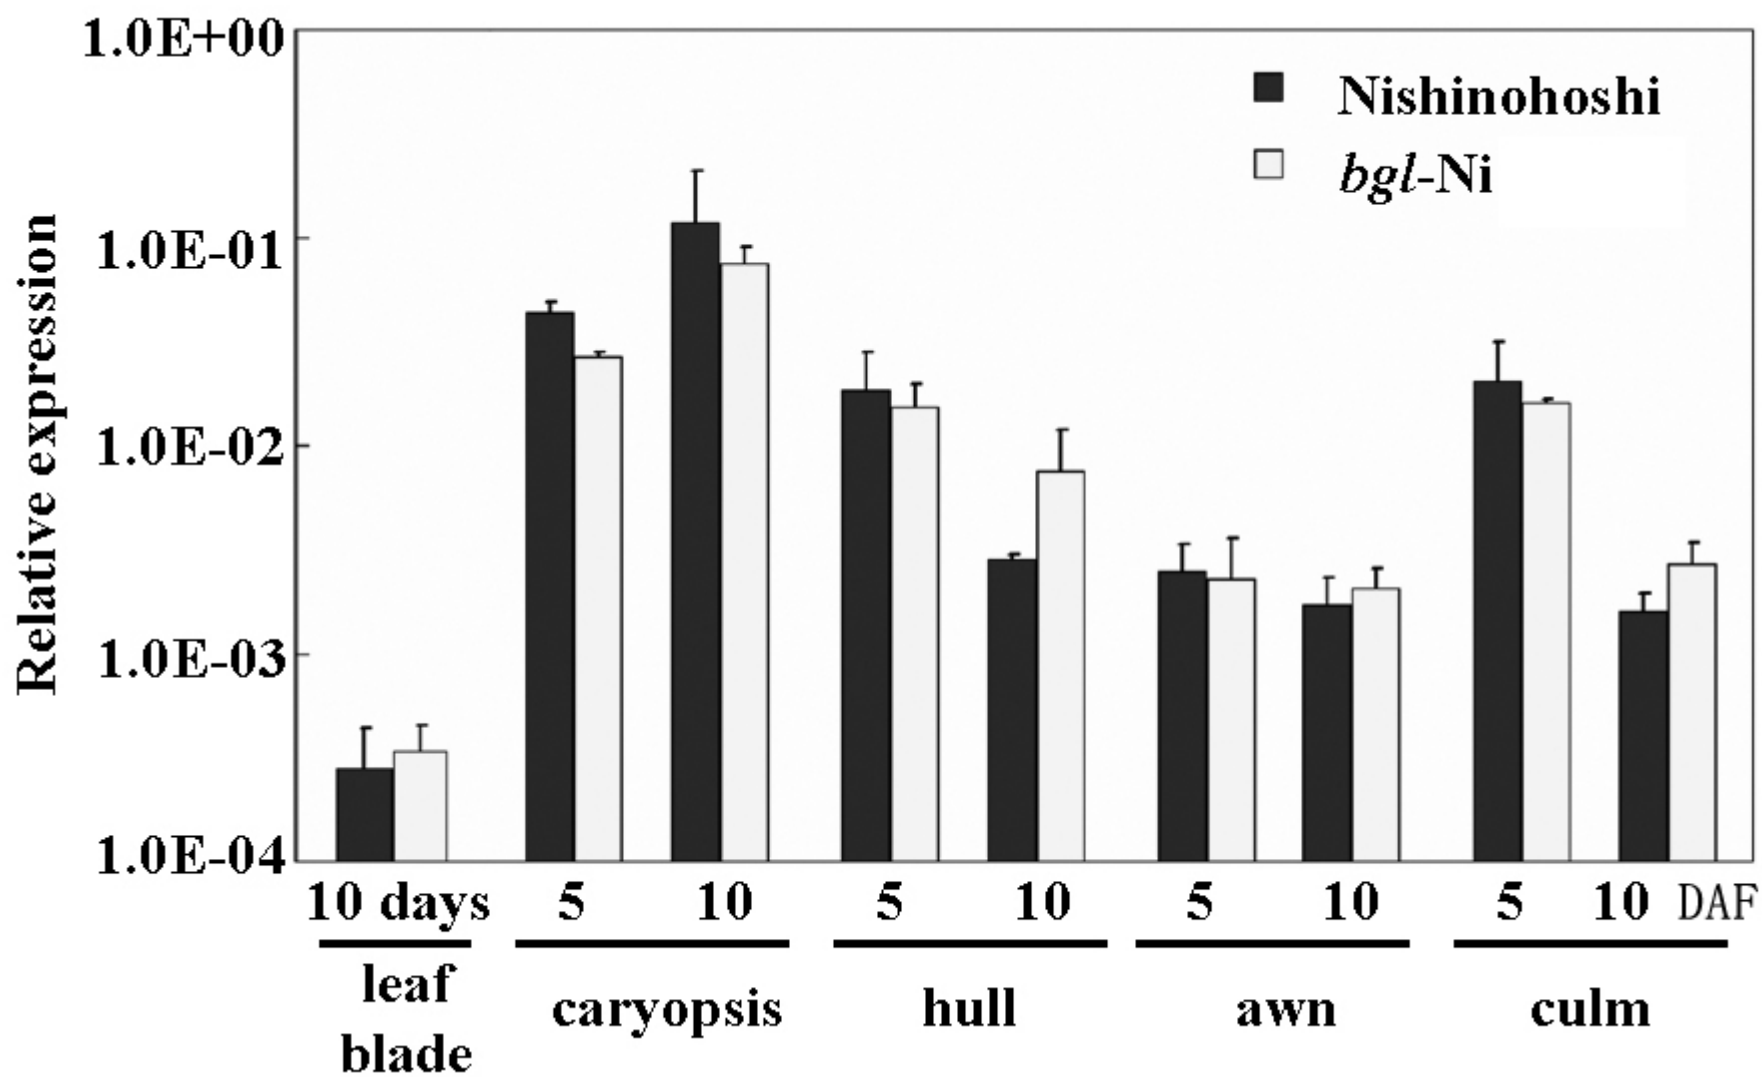

Fig. S2

```

HvCs1F6 1: MAPAVAGGGRVRSNEPVAAAAAPAASGKPCVCGFQVCACTGSAAVASAASSLMDIVAMGQIGAVNDESWVGVELGEDGETDES---GAAVDDRPVFRTEKIKGVLLHPYRVLIFVRLI 117
OsCs1F6 1: MAPAVAGGGRRNNEGVNGNAAP-----ACVCGFPVCACAGAAVASAASSADMIVAAGQIGAVNDESWVAVDLSDSDDAPAAGDVQGALDDRPVFRTEKIKGVLLHPYRVLIFVRLI 115
HvCs1F10 1: -----MLSPRTDAGAGAATDLSQPLLWNRNGVHAGALVVMVVVANGHGGGDKLKGAPKAKDKYWKVDVQPDMAAAPDL--NGGGRPLLFSNRRVKNIILCPYRVLILIRVI 106
HvCs1F3 1: -----MASAAGAAGSNASLAAPLLASRE-----GGAKKPVGAKGKHWAAADK-DERRAAKESG--GEDGRPLLFRYKVKGTLHPYRALIFIRLI 83
HvCs1F9 1: -----MASPAVGGGRLADPLLAADV VVGAKDKYVWPADEREILASQSSGGGEQDGRAPLLYRTRFRVKGFFINLYRLLTLRVRI 80
HvCs1F8 1: -----MGSLAAANGAGHASNGAGVADQALALENGTGNGHKASDANRATPVQQANGSSKAAGKVS PKDKYVWAVDEGEMAAA IADGG--EDGRRPLLRYRTRFKVKGILLHPYRLLSLIRLV 112
HvCs1F4 1: -----MAPAVTRRANALRVEAPDGAESGRASLAADSPAAKRAIDAKDDVWVAAAEG-----DASGASAGNGDRPPLFRTMKVKGSILHPYRFMILVRLV 90
HvCs1F7 1: -----MLMITYIKKHIDYVATLDEKESPADEKSN-----VERLLVRTTKLTTVTIKLYRLMIVRMA 57
                          : .                               : . . : . : * : . : * :

HvCs1F6 118: AFTLFIWRIS-----HKNPDMWLWVTSICGEFVWFGFSWLLDQLPKLNPINRVPLAVLRQRFRDPDGTSTLPGLDIFVTTADPIKEPILSTANSVLSILAADYPVDRNTCYVSDDS 230
OsCs1F6 116: AFTLFIWRIE-----HKNPDMWLWVTSIAGEFVWFGFSWLLDQLPKLNPINRVPLAVLRFRFDHADGTSSLPGLDIFVTTADPIKEPILSTANSILSILAADYPVDRNTCYVSDDS 228
HvCs1F10 107: TVILFVGWRIK-----HNNSDVMWFWMMSVVADVWVWVWVSLWLSYQLPKYNPKRIPDLATLRQYDTPGRSSQLPSIDVIVTTASATDEPILYTMNCVLSILAADYHIGRCNCYLSDS 219
HvCs1F3 84: AVLLFFVWRIK-----HNKSDIMWFWTISVVGDVWVWFGFSWLLNQLPKFNPKIPDMVALRRQYDLSDGTSTLPGIDVFTTADPIDEPILYTMNCVLSILASDYPVDRACACYPDDS 196
HvCs1F9 81: VVILFFTWMR-----HRSDAMWLWVIVSGDLWFGVTVWLLNQITKLKPKRCVPSISVLREQLDQPDGSDPLPLDVFINTVDPVDEPMLYTMNSILSILATDYPVQKYATYFSDDG 193
HvCs1F8 113: AIVLFFVVRVR-----HPYADGMWLWVISMVGDVWFGVTVWLLNQVAKLNPVVRPNLALLQQQFDLPDGNLPLCLDVFINTVDPINEMPMIYTMNSISILAADYPVDKHACYLSDDG 225
HvCs1F4 91: AVVAFFAWRLK-----HKNHDGMWLWATSMVADVWVWFGFSWLLNQLPKLNPKIRVPLAALADQCG--SSGDANLPGIDIFVTTVDPVDEPILYTVNTILSILATDYPVDKYACYLSDDG 202
HvCs1F7 58: IFVLFKWRISTALAMTNGTSTARAMWTVSIAGELWFALMWVLDQLPKMQTVR-----RTVFATALESLLPTMDVFTTADPDKPPLVTVNTILSILAADYPDKLTCYVSDDG 169
    .  *  **:         :          : * : . . : ** . * : * : * : . .          : ** : * : : . * . . ** : * * : * : * * : * * : * : * .

                                  253

HvCs1F6 231: GMLTYEALAESSKFATLWVPFCRKHGIEPRGPESYFELKSH-----PYMGRAQDEFVNDRRRVRKEYDEFKARINSLHDIKQRNDGYNAAIASHQGVPRPTWMADG--TQWEGTWVD 342
OsCs1F6 229: GMLTYEAMAEAKFATLWVPFCRKHAI EPRGPESYFELKSH-----PYMGRAQE EFVNDRRRVRKEYDDFKARINGLEHDIKQRSYNAAGVKDGEPRATWMADG--SQWEGTWIE 340
HvCs1F10 220: GSVLVYEALVETAKFAALWVPFCRKHQI EPRAPESYFELKGP-----LYGGTPHKEFFQDYKHLGTQYEEFKNLDMLPNTIHQRSYNAAGVKDGEPRATWMADG--TQWPGTWLD 330
HvCs1F3 197: GALIQYEALVETAKFATLWVPFCRKHCIEPRAPESYFEIEAP-----LYTGTAPEEFKNDYSSVHKEYDEFKERLDSLDAISKRSDAYNSMKT EGD--AKATWMANG--TQWPGSWID 307
HvCs1F9 194: GSLVHYEGLLLAEFASWVPFCRKHCVEPRAPESYFVAKMRG-----EYAGSAAKEFLDHRMRAAAYEEFKARLDGSAVIEQRSEACNRAANEKEGCGNATWMADG--TQWPGTWIK 307
HvCs1F8 226: GSIHYDGLELLETAKFAALWVPFCRKHSIEPRAPESYFSLNTR-----PYTGNAPQDFVNDRRHMCREYDEFKERLDALFTLIPKRSVYVNHAAAGKEG--AKATWMADG--TQWPGTWID 335
HvCs1F4 203: GTLVHYEAMIEVANFAVMWVPFCRKHCVEPRSPENYFGMKTQ-----PYVGSMA GEFMRHRRRVRREYDEFKVRIDSLSTIRQRSYNAAGVKDGEPRATWMADG--TQWPGTWIE 312
HvCs1F7 170: GALLTREA VVEARFAGLWVPFCRKHGV EPRNPEAYFSGHVKRVVSRADYKGRS WPELARRRRRVRREYEELRLRVDALHAGDVQR-----PWRSRQ----- 262
    * : : . : : . * * * : * * * * : * * * : * * : : : * : : : * : * : * : * : * : * : * : * : * : * :

```

**Fig. S3**

|          |                                                                                                                                                 |     |
|----------|-------------------------------------------------------------------------------------------------------------------------------------------------|-----|
| HvCs1F6  | 343: ASENHRRGDHAGIVLVLLNHPSHRRQTGPPASADNPLDLSGVDVRLPMLVYVSREKRPGHDHQQKAGAMNALTRASALLSNSPFILNLDGDHYINNSQALRAGICFMVG-RSDTVAFAVQ                   | 461 |
| OsCs1F6  | 341: QSENHRKGDHAGIVLVLLNHPSHARQLGPPASADNPLDFSGVDVRLPMLVYVAREKRPGCNHQKAGAMNALTRASAVLSNSPFILNLDGDHYINNSQALRAGICFMLG-RSDTVAFAVQ                    | 459 |
| HvCs1F10 | 331: PAEKHRAGHHAGIVKIVQSHPEHVQPGVQESLDNPLSFDDVDVRLPMLVYVAREKSPGIEHNKKAGALNAELRISALLSNAPFFINFDCDHYINNSEALRAAVCFMLDPREGDNTGFVQ                    | 450 |
| HvCs1F3  | 308: TTEIHRKHGHAGIVKVVLDSIRGHNLGSQESTHN-LSFANTDERLPMLVYISRGKNPSYDHKKAGALNAQLRASALLSNAQFIINFDCDHYINNSQALRAAMCFMLDQRQGDNTAFVQ                     | 426 |
| HvCs1F9  | 308: PAKGHRKHGHPAILQVMLDQPSKDPDELGMASSDHPDLFSAVDVRLPMLVYIAREKRPGYDHQKAGAMNVQLRVSALLSNAPFIINFDCDHYINNSQAFRAAMCFMLDPREGDNTAFVQ                    | 427 |
| HvCs1F8  | 336: PAENHKKGQHAGIVKVLKHPSEYEPGLGASTNSPLDFSAVDVRLPMLVYISREKSPSCDHQKAGAMNVQLRVSALLTNAPFIINFDCDHYVNNKAFRAGICFMLDRREGDNTAFVQ                       | 455 |
| HvCs1F4  | 313: QVENHRRGQHAGIVQVILSHPSCKPQLGSPASTDNPLDFSVDTRLPLVYMSREKRPGYNHQQKAGAMNMRRVSALLSNAPFVNFDCDHYINNTQALRAPMCFMLDPRDQNTAFVQ                        | 432 |
| HvCs1F7  | 263: -----TPEDHAGVVEVLVDPSPCTPEP-----GVSGNLLDLSSVDVRPALVYMCREKRGRRAHHRKAGAMNALLRTSAVLSNAPIILNLDGDHYVNNKALRAGVCLMLD-RGGSVAVFVQ                   | 373 |
|          | . * . . : : . . . : * . : * * * * * : * * . * : * * * * : * * * * * : . : * : * * * * * : * * * * * : * * . . . * * *                           |     |
|          |                                                                                                                                                 |     |
| HvCs1F6  | 462: FPQRFEGVDPTDLYANHNRIFFDGLRALDGMQGPPIYVGTGCLFRRITVYGFDPPIRINVGGPCFPRLAGLFAKTKYEKPGLEMTAKAKAAPVP-----AKGKHGFLPLPKTYGKSDAF                    | 576 |
| OsCs1F6  | 460: FPQRFEGVDPTDLYANHNRIFFDGLRALDGLQGPPIYVGTGCLFRRITLYGFEPPIRINVGGPCFPRLGGMFAKNRYQKPGFEMTKPGAKPVAPPPAATVAKGKHGFLPMPKKAYGKSDAF                  | 579 |
| HvCs1F10 | 451: FPQRFNDVPTDRYGNHNRVFFDGAMYGLNGQQGPTYLGTGCMFRPLALYIDPPCWAEDIIVDSNRFG-----NSLPF                                                              | 525 |
| HvCs1F3  | 427: FPQRFNDVPSDRYGNHNRVFFDGTMALNGLQGSPYLGTGCMSTRRIALYIDPPDWRHDIIVDDKFKG-----SSIPF                                                              | 501 |
| HvCs1F9  | 428: FPQRFDDVDPTDRYCNHNRVFFDATALLGLNGIQGPSYVGTGCMFRRVALYSADPPRWRSDDAKEAKASHRPNM-----FGKSTSF                                                     | 507 |
| HvCs1F8  | 456: FPQRFDDVDPTDRYCNHNRVFFDATALLGLNGIQGPSYVGTGCMFRRVALYGVDPPIRWRPDDVKIVDSSSK-----FGSSESF                                                       | 532 |
| HvCs1F4  | 433: FPQRFDDVDPTDRYANHNRVFFDGTMLSLNGLQGPSYLTGTMFRRVTLYGMEPPRYRAENIKLVGKTYE-----FGSSTSF                                                          | 509 |
| HvCs1F7  | 374: FPQRFDDVDPADRYANHNRVFFDCTELGLDGLQGPPIYLTGCMFRRALYSIDPPLWWSHGDSAGKDVAAEADKFG-----VSTPFLGSV                                                  | 459 |
|          | ***** : ***** : * * * * * : * * * * * : * * * * * : * * * * * : * * * * * : * * * * * : * * * * * : * * * * * : * * * * * : * * * * *           |     |
|          |                                                                                                                                                 |     |
| HvCs1F6  | 577: VDTIPRASHPSPYAAAEGIVADEATIVEAVNVTAAAFEKKTGWGKEIGWVYDVTEDVVTGYRMHIKGRSRYCSIYPHAFIGTAPINLTERLFQVLRWSTGSLEIFFSKNNPLFGSTY                      | 696 |
| OsCs1F6  | 580: ADTIPRASHPSPYAAEAA-VADEAAIAEAVMVTAAAYEKKTWGSDIGWVYGTVEDVVTGYRMHIKGRSRYCSIYPHAFIGTAPINLTERLFQVLRWSTGSLEIFFSRNNPLFGSTF                       | 698 |
| HvCs1F10 | 526: LNSVLAAIKQEEGVTLPP-PLDSDLEEMTKVVVSCSYDDSDTWGRGIGYINMATEDIVTGFRIHGGQWCSMYVTMEREAFRTGAPINLTERLRQIVRWGGSGLEMFSSHISPLFAGRR                     | 643 |
| HvCs1F3  | 502: LDSVSKAINQER-STIPP-PISETLVAEMERVVSASHDKATGWGKGVGYDYDIATEDIVTGFRIHGGQWRSMYCTMERDAFCGIAPINLTERLHQIVRWGGSGLEMFSSLNPLIGRR                      | 618 |
| HvCs1F9  | 508: INSMPTAAANQERSVPSP-----ATVGEAELADAMTCAYEDGTEWGNQVGVYNIATEDVVTGFRHRGWRSTYCAMEDAFRTGAPINLTERLYQILRWGGSGLEMFSSRFPCPLLAGRR                     | 622 |
| HvCs1F8  | 533: ISSILPAADQERSIMSPP-ALYESVMADLAHVMTCAVEDGTWGREVGVWYNIATEDVVTGFRHRGWRSMYCRMEDAFRTGAPINLTERLYQILRWGGSGLEMFSSHNCPLLAGRR                        | 650 |
| HvCs1F4  | 510: INSMPTGAIQERSITPVL-VDEALSNLDLATLMTCAVEDGTWGRDVGWYNIATEDVVTGFRMHRGWRSMYCSMEPAAFRTGAPINLTERLYQVLRWGGSGLEMFSSNALMAGRR                         | 626 |
| HvCs1F7  | 460: RAALNLRSEQRNTGTSPPCSSDAAAVGEATALVSCGYEDRTAWGREIGWYGTVEDVATGFCMHRGWRSAFCATAPDAFRGTGAPINLTDRLHQVLRWAAGSLEIFFSRNNALLAGRR                      | 579 |
|          | : : . : : : : * * * * * : * * * * * : * * * * * : * * * * * : * * * * * : * * * * * : * * * * * : * * * * * : * * * * * : * * * * *             |     |
|          |                                                                                                                                                 |     |
| HvCs1F6  | 697: LHPLQRVAYINITTYPFTAIFLIFYTTVPALSFVT-----GHFIVQRPTTMFYVYLIVLSTLLVIAVLEVWAGVTVFEWFRNGQFWMATASCAYLAAVCVLTKVIFRRDISFKLTS                       | 810 |
| OsCs1F6  | 699: LHPLQRVAYINITTYPFTAIFLIFYTTVPALSFVT-----GHFIVQRPTTMFYVYLIVLSTLLVIAVLEVWAGVTVFEWFRNGQFWMATASCAYLAAVLVVTKVIFRRDISFKLTS                       | 812 |
| HvCs1F10 | 644: LSLVQLRSYINFTIYPLTSLFILMYAFCPVMWLLP-----TEILIQRPYTRYIVYLIIVVAMIHVGIMFEMWAGITWLDWVRNEQFFMIGSVTAYPTAVLHMVNNLTKKGIHFRVTT                      | 757 |
| HvCs1F3  | 619: IHALQRVSYLNMTVYPTVTSFLIFLLYALSPVMWLIP-----DEVYIQRPFQYVYVFLVILMIHIGWLEIKWAGVTWLDYWRNEQFFMIGSTAYPAVLMVNNLTKKGIHFRVTS                         | 732 |
| HvCs1F9  | 623: LHPMQRVAYINMTYVSTFIFLLMYFYFPVMWLFQ-----GEFYIQRPFQTFALFVVVVIATVELIGMVEIRWAGLTLLDWRNEQFYIIGTGVYPMAMHLILRSLGKGVSFKLTA                         | 736 |
| HvCs1F8  | 651: LHPMQRVAYANMSTYVSSVFLVYFLLFPVIWIFR-----GQFYIQRPFQTYLVIVIALTELIGMVEIKWAGLTLLDWRNEQFYIIGATAVYPTAVFHVILKFLGKGVSFKLTA                          | 764 |
| HvCs1F4  | 627: IHPLQRVAYLNMTSTYIVTFILAYLFPVMWLFQ-----EQFYIQRPFQTYIMLVGVIAMIHVGIMFVWAGITLLDWRNEQFYIIGATAVYPTAVLVMALKVLTKGKIVFRLTS                          | 740 |
| HvCs1F7  | 580: LHPLQRVAYLNMTYVSTFIFLLYVCLLPALPLVTRSATMSAFSTNMPSSSTYITFAALMLTLAMVAALVLRWSGITPEGWRNEQFWMVSTAYAAAVVQVALKVLVGKEVAFKLTS                        | 699 |
|          | : * * * * * : * * * * * : * * * * * : * * * * * : * * * * * : * * * * * : * * * * * : * * * * * : * * * * * : * * * * * : * * * * * : * * * * * |     |

Fig. S3 continued.



|          |                                                                                                                              |                                 |
|----------|------------------------------------------------------------------------------------------------------------------------------|---------------------------------|
| HvCs1F6  | 811:KLPSGDEKK-----DPYADLYVVRWTPLMITPIIIIFVNIIGSAVAFAKVLDGEW----THWLKVAGGVFFNFVWLFHLYPFAKGILGKHGKTPVVVLVWVAFTFVITAVLYINIPHMHT | 921                             |
| OsCs1F6  | 813:KLPAGDEKK-----DPYADLYVVRWTWLMITPIIIILVNIIGSAVAFAKVLDGEW----THWLKVAGGVFFNFVWLFHLYPFAKGILGKHGKTPVVVLVWVAFTFVITAVLYINIPHIHG | 923                             |
| HvCs1F10 | 758:KQPVADTD-----DKYAEMYEVHWVPMMPAVVVLFSNILAIGVAIGKSVLYMGTWVSAQKRHGALGLLNLWIMVLLYPFALAIIGRWAKRTGILFILLPIAFLATALMYIGIHTFLL    | 871                             |
| HvCs1F3  | 733:KQTTADTN-----DKFADLYDMRWVPMLIPTTVVLIANVGAIGVAMGKTIVYMGAWTIAQKTHAALGLLNFVWIMVLLYPFALAIMGRWAKRPVILVVLLPVAFTIVCLVYVSVHILLL  | 846                             |
| HvCs1F9  | 737:KKLTGGAR-----ERLAELYDVQWVPLLVPVTVVMAVNVAAGAAAGKAIVGR--WSAAQVAGAASGLVFNWMLLLLYPFALGIMGHWSKRPYILFLVLVTAVAATASVYVALAGSLL    | 848                             |
| HvCs1F8  | 765:KQVASSTS-----DKFAELYAVQWAPMLIPTMVVIAVNVCAIGASIGKAVVGG--WSLMQMADAGLGLVFNWILVLIYPFALGMIGRWKRPYILFVILFVIAFILIALVDIAIQAMRS   | 876                             |
| HvCs1F4  | 741:KQTDACSN-----DKFADLYTVRWVPLLFPVAVLIVNVAAVGAAIGKAAAWG--FFTDQARHVLLGMVFNWILVLLYPFALGIMGWGKRPIILFVMLIMAIGAVGLVYVAFHDPYP     | 852                             |
| HvCs1F7  | 700:KRRASGSGGGVVKGRFAELYAVRWTVLMVPTAVVLAVNVASMAAAVQERRWRKG-----PAAVLATAFNWVVVHLHPFALGLMGRWSKTLSPLLLLVVAFTILSLCFLHLHML--      | 810                             |
|          | * .                   *:* :*: :... : : * . . . : :                                                                           | . ** *:. :*** .:*. *       .: : |
| HvCs1F6  | 922:SGGKHTTVHGHHGKLVDTGLYGWLH---                                                                                             | 947                             |
| OsCs1F6  | 924:PGRHGAASPSHGHSAGTKKYDFTYAWP                                                                                              | 952                             |
| HvCs1F10 | 872:HFFPSMLV-----                                                                                                            | 879                             |
| HvCs1F3  | 847:SFLPF-----                                                                                                               | 851                             |
| HvCs1F9  | 849:YLHSGIKLV-----                                                                                                           | 857                             |
| HvCs1F8  | 877:GIVRFHFKSSGGATFPTSWGL-----                                                                                               | 897                             |
| HvCs1F4  | 853:TDFSEVAASLGEASLTGPSG-----                                                                                                | 872                             |
| HvCs1F7  | 810:-----                                                                                                                    | 810                             |

Fig. S3 concluded.

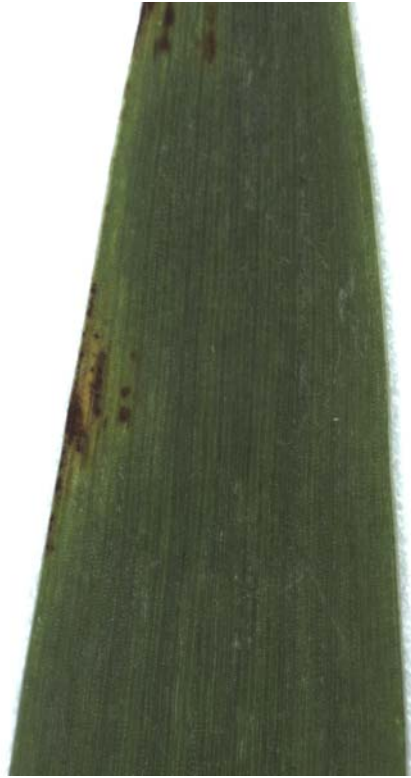

**Akashinriki**

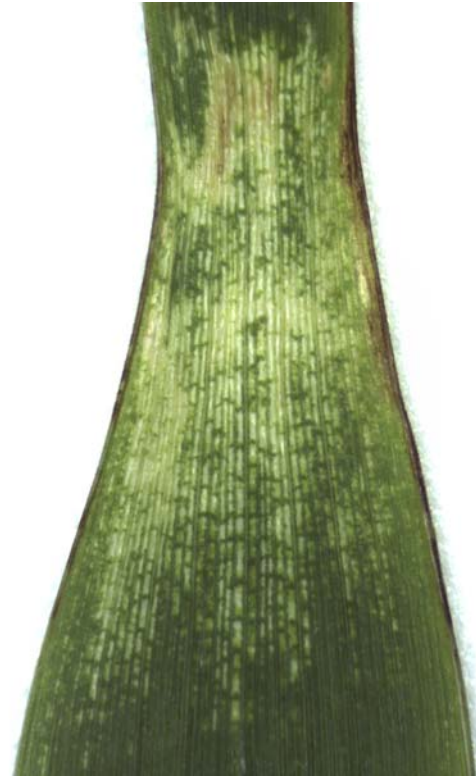

**OUM125**

Fig. S4



# Seedling tissue - Akashiniriki vs OUM 125

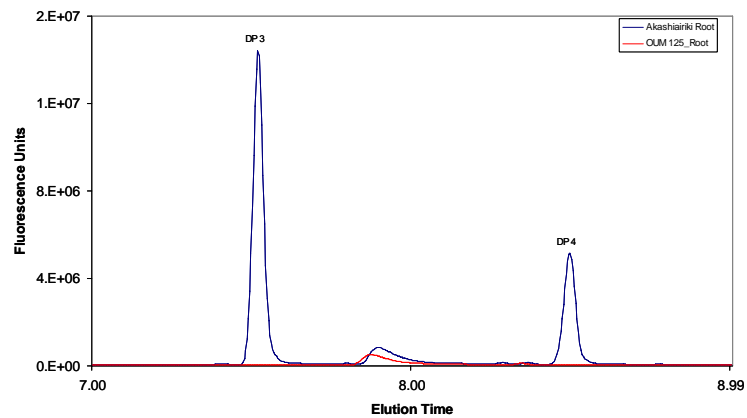

ROOT

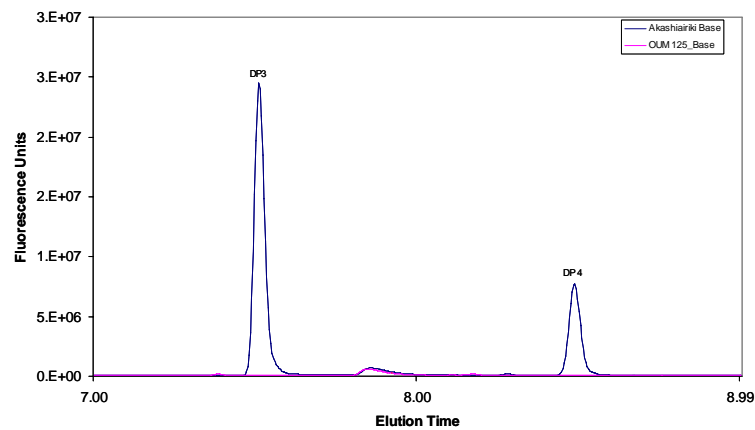

LEAF BASE

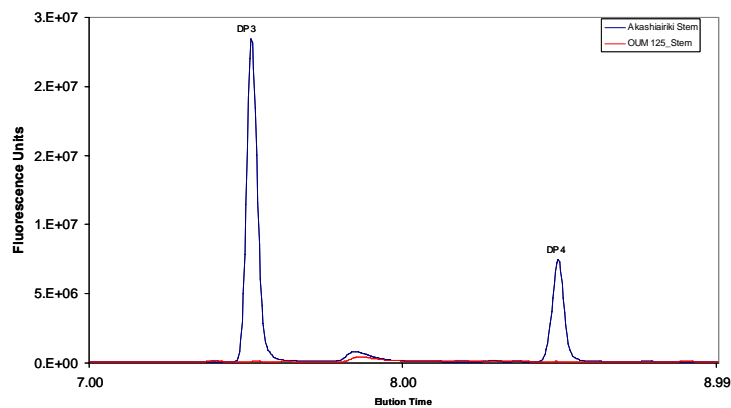

STEM

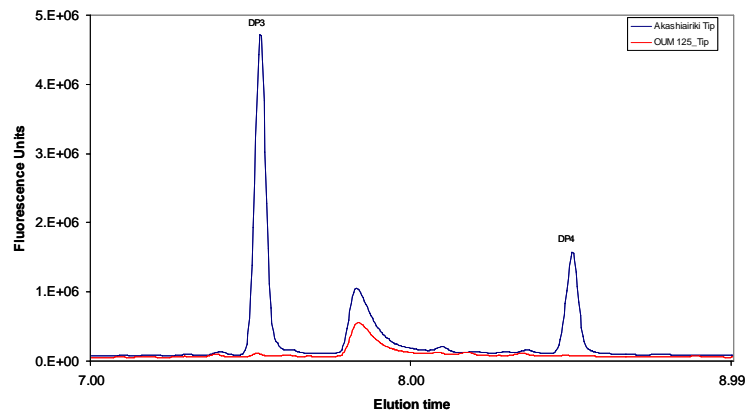

LEAF TIP

DP3

DP4

DP3

DP4

Fig. S5

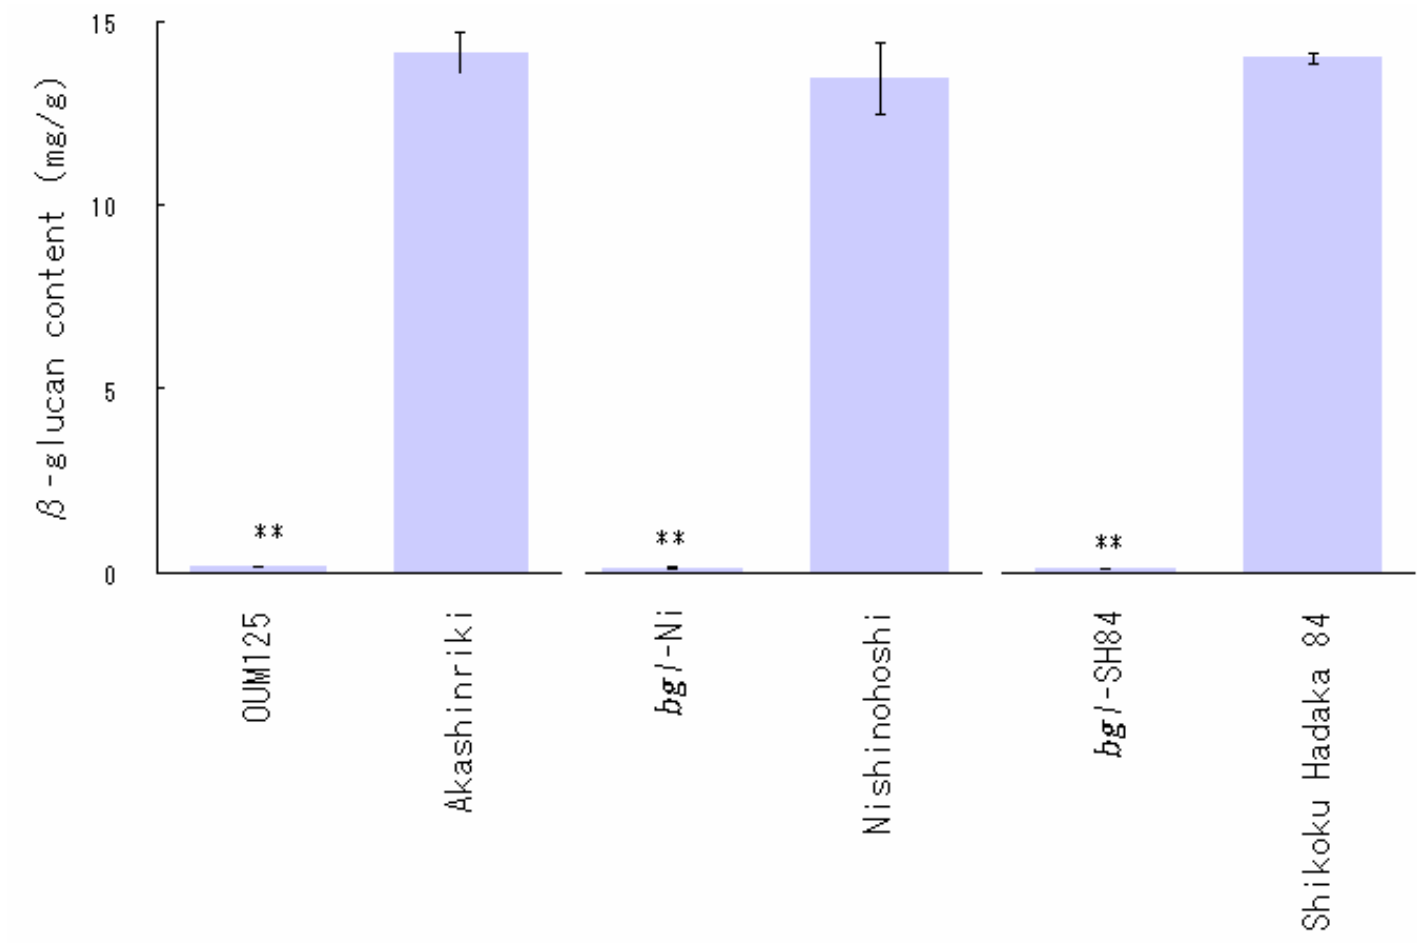

Fig. S6

Supplementary Table S1. Primer sequences used in this study.

| Primer name       | Primer sequence (5'-3')   |
|-------------------|---------------------------|
| Mapping           |                           |
| <i>Waxy</i> (F)   | TGGATCCAAATCCTGCATGT      |
| <i>Waxy</i> (R)   | CATGGTTTTGTCCGGTTTC       |
| <i>HvGlb2</i> (F) | CTCTTGAGAATCCTCACCTTTCAT  |
| <i>HvGlb2</i> (R) | CTCAATAAAAAGTATGCCCAAAATG |

Genomic sequencing of *HvCslF6*

| For amplification of the entire gene |                          |
|--------------------------------------|--------------------------|
| HvCSLF6_CP1-1F                       | AGAGTGAGTGCGTGCATTGAG    |
| HvCSLF6_CP1-2R                       | TGTTGAGTGGATGAGTTGTTTCTT |
| For internal sequencing              |                          |
| N8.B10-M13-RV(2)                     | CAATTAACCCAACAAGCACC     |
| N8.B10-M13-RV(3)                     | AGTTTTTGTGAGCGTTTTATG    |
| N8.B10-M13-RV(4)                     | GACTTGCCAGCTCTCTCCTT     |
| N8.B10-M13-RV(5)                     | AACACATGCTACGTCTCCGA     |
| N8.B10-M13-RV(6)                     | GTGGTGATAGTCGAGAGTGC     |
| N8.B10-M13-RV(7)                     | GCTGCTCTCCAACCTCCCCCT    |
| N8.B10-M13-RV(8)                     | AGGACGTGGTCACCGGCTAC     |
| N8.B10-M13-RV(9)                     | TCACATCCAAGCTACCCTCG     |
| N8.B10-M13-20(2)                     | GAATATCACCTTGGTCAGCA     |
| N8.B10-M13-20(3)                     | GCCACGATCCCCCTCAGCCGC    |
| N8.B10-M13-20(4)                     | CACGTACACCAGCATGGGGA     |
| N8.B10-M13-20(5)                     | GAGGCCCTAACTAACCAAGA     |
| N8.B10-M13-20(6)                     | AGGATGGAGAGCACCGAGTT     |
| N8.B10-M13-20(7)                     | CGAGCTGGCACACTTGGC       |
| N8.B10-M13-20(8)                     | AAACTCGCCGTACATAGGAT     |
| N8.B10-M13-20(9)                     | TGCTTGTGGGTTAATTGTAGT    |

cDNA sequencing of *HvCslF6*

| For amplification of the entire cDNA |                          |
|--------------------------------------|--------------------------|
| HvCSLF6_CP1-1F                       | AGAGTGAGTGCGTGCATTGAG    |
| HvCSLF6_CP1-1R                       | TTGAGTGGATGAGTTGTTTCTTGT |
| For internal sequencing              |                          |
| HvCslF6 F2                           | GTATTCCGCACCCGAGAAGAT    |
| HvCslF6 F4                           | CTACGTCTCCGACGACAGTG     |
| HvCslF6 F7                           | CCTCGACTGCGATCATTACA     |
| HvCslF6 F9                           | AAGGGTAAGCACGGCTTCTTG    |
| HvCslF6 F11                          | CTACCTGGGCATCGTGTAT      |
| HvCslF6 R1                           | GAGAGGATGGGCTCCTTGAT     |
| HvCslF6 R3                           | ATGAAGGGGGAGTTGGAGAG     |
| HvCslF6 R4                           | GTCGAAGAAGATGCGGTTGT     |
| HvCslF6 R6                           | ATGAAGGCGTGTGGGTAGAT     |
| HvCSLF6_P28R                         | GCACCCAGAAGTTGAAGAAGAC   |

*bgl.b* mutant allele detection in KM27: Restriction enzyme *Bsr* FI

|                 |                      |
|-----------------|----------------------|
| HvCSLF6_MPP2-1F | ATCAAGGAGCCCATCCTCTC |
| HvCSLF6_MPP2-1R | TTGATCCTGGCCTTGAAGTC |

*bgl.c* mutant allele detection in KM30: Restriction enzyme *Fnu* 4HI

|                |                     |
|----------------|---------------------|
| HvCSLF6-MPP- L | TGGGTGTACGACACCGTCA |
| HvCSLF6-MPP-R  | GCGGAGCACCTGGAAGAG  |

Supplementary Table S2. Allelic variation in genomic sequences of the *HvCSLF6* gene.

| Polymorphism      | intron 1    |             |             |             |             |         |            |        |        |         |        |        |        |        |         |        |        | intron 2 |             |             |             |             |             |             |                         |             |                  | exon 3      |             |             |
|-------------------|-------------|-------------|-------------|-------------|-------------|---------|------------|--------|--------|---------|--------|--------|--------|--------|---------|--------|--------|----------|-------------|-------------|-------------|-------------|-------------|-------------|-------------------------|-------------|------------------|-------------|-------------|-------------|
| nt position       | 174         | 333         | 412         | 558         | 620         | 749     | 752        | 988    | 1064   | 1137    | 1162   | 1188   | 1212   | 1398   | 1491    | 1530   | 1656   | 1737     | 2768        | 2958        | 3070        | 3133        | 3164        | 3173        | 3175                    | 3262        | 3317             | 3347        | 4064        | 4801        |
| nt change         | G<br>→<br>A | C<br>→<br>T | C<br>→<br>A | A<br>→<br>G | G<br>→<br>C | T→<br>A | ins.<br>31 | →<br>G | →<br>T | Δ 14    | →<br>G | →<br>C | →<br>G | →<br>A | Δ 2     | →<br>G | →<br>C | →<br>T   | T<br>→<br>C | C<br>→<br>T | G<br>→<br>A | C<br>→<br>T | C<br>→<br>T | ins.<br>338 | (CA<br>TT) <sup>n</sup> | A<br>→<br>G | (T) <sup>n</sup> | T<br>→<br>C | G<br>→<br>A | T<br>→<br>C |
| aa change         | no          | —           | —           | —           | —           | —       | —          | —      | —      | —       | —      | —      | —      | —      | —       | —      | —      | —        | —           | —           | —           | —           | —           | —           | —                       | —           | —                | —           | A<br>→<br>T | no          |
| aa position       | 58          |             |             |             |             |         |            |        |        |         |        |        |        |        |         |        |        |          |             |             |             |             |             |             |                         |             |                  |             | 590         | 835         |
|                   | SNP1        | SNP2        | SNP3        | SNP4        | SNP5        | SNP6    | indel 1    | SNP7   | SNP8   | indel 2 | SNP9   | SNP10  | SNP11  | SNP12  | indel 3 | SNP13  | SNP14  | SNP15    | SNP16       | SNP17       | SNP18       | SNP19       | SNP20       | indel 4     | SSR1                    | SNP21       | indel 5          | SNP22       | SNP23       | SNP24       |
| OUH625            | G           | C           | C           | G           | G           | T       | no         | T      | C      | no      | T      | T      | A      | G      | no      | C      | T      | C        | T           | C           | G           | C           | C           | no          | 3                       | A           | 9                | T           | G           | T           |
| Beka              | G           | C           | C           | A           | G           | T       | no         | T      | C      | no      | T      | T      | A      | G      | no      | C      | T      | C        | T           | C           | G           | C           | C           | no          | 3                       | A           | 9                | T           | G           | T           |
| Sachiho Golden    | G           | C           | C           | A           | G           | T       | no         | T      | C      | no      | T      | T      | A      | G      | no      | C      | T      | C        | T           | C           | G           | C           | C           | no          | 3                       | A           | 9                | T           | G           | T           |
| Derkado           | G           | C           | C           | A           | G           | T       | no         | T      | C      | no      | T      | T      | A      | G      | no      | C      | T      | C        | T           | C           | G           | C           | C           | no          | 3                       | A           | 9                | T           | G           | T           |
| Haruna Nijo       | G           | C           | C           | A           | G           | T       | no         | T      | C      | no      | T      | T      | A      | G      | no      | C      | T      | C        | T           | C           | G           | C           | C           | no          | 3                       | A           | 9                | T           | G           | T           |
| OUI444            | G           | C           | C           | A           | G           | T       | no         | T      | C      | no      | T      | T      | A      | G      | no      | C      | T      | T        | T           | C           | G           | C           | C           | no          | 3                       | A           | 9                | T           | G           | T           |
| OUJ066            | G           | C           | C           | A           | G           | T       | no         | T      | C      | no      | T      | T      | A      | G      | no      | C      | T      | C        | T           | C           | G           | C           | C           | no          | 3                       | A           | 9                | T           | G           | T           |
| OUM382            | G           | C           | C           | A           | G           | T       | no         | T      | C      | no      | T      | T      | A      | G      | no      | C      | T      | C        | T           | C           | G           | C           | C           | no          | 3                       | A           | 9                | T           | G           | T           |
| M-737             | G           | C           | C           | A           | G           | T       | no         | T      | C      | no      | T      | T      | A      | A      | no      | C      | T      | C        | T           | C           | G           | C           | C           | no          | 3                       | A           | 9                | T           | G           | T           |
| CDC-Fibar         | G           | C           | C           | A           | G           | T       | no         | T      | C      | no      | T      | T      | A      | A      | no      | C      | T      | C        | T           | C           | G           | C           | C           | no          | 3                       | A           | 10               | T           | G           | T           |
| Azhul             | G           | C           | C           | A           | G           | T       | no         | T      | C      | no      | T      | T      | A      | A      | no      | C      | T      | C        | T           | C           | G           | C           | C           | no          | 2                       | A           | 9                | T           | G           | T           |
| B83-12/21/5       | G           | C           | C           | A           | G           | T       | no         | T      | C      | no      | T      | T      | A      | A      | no      | C      | T      | C        | T           | C           | G           | C           | C           | no          | 3                       | A           | 9                | T           | G           | T           |
| Minerva           | G           | C           | C           | A           | G           | T       | no         | T      | C      | no      | T      | T      | A      | A      | no      | C      | T      | C        | T           | C           | G           | C           | C           | no          | 3                       | A           | 9                | T           | G           | T           |
| OUH725            | G           | C           | C           | G           | G           | T       | no         | T      | T      | no      | G      | T      | G      | G      | no      | C      | T      | C        | T           | C           | A           | C           | C           | +           | 3                       | A           | 9                | T           | G           | T           |
| OUH737            | G           | C           | C           | G           | G           | T       | no         | T      | T      | no      | G      | T      | G      | G      | no      | C      | T      | C        | T           | C           | A           | C           | C           | +           | 3                       | A           | 9                | T           | G           | T           |
| OUH602            | C           | C           | C           | G           | G           | T       | no         | T      | T      | no      | G      | T      | G      | G      | no      | C      | T      | C        | T           | C           | A           | C           | C           | +           | 4                       | A           | 9                | T           | G           | T           |
| Nishinohoshi      | G           | T           | C           | G           | G           | T       | no         | T      | T      | no      | G      | T      | G      | G      | no      | G      | T      | C        | T           | C           | A           | C           | C           | no          | 3                       | A           | 9                | C           | G           | T           |
| OUH639            | G           | C           | C           | G           | G           | T       | no         | T      | T      | no      | G      | T      | G      | G      | no      | G      | T      | C        | T           | C           | A           | C           | T           | no          | 3                       | G           | 9                | T           | G           | T           |
| Shikoku Hadaka 84 | G           | C           | C           | G           | G           | T       | no         | T      | T      | no      | G      | T      | G      | G      | no      | G      | T      | C        | T           | C           | A           | C           | T           | no          | 3                       | G           | 9                | T           | G           | T           |
| SH 84 (lys5h)     | G           | C           | C           | G           | G           | T       | no         | T      | T      | no      | G      | T      | G      | G      | no      | G      | T      | C        | T           | C           | A           | C           | T           | no          | 3                       | G           | 9                | T           | G           | T           |
| Akashinriki       | G           | C           | C           | G           | G           | T       | no         | T      | T      | no      | G      | T      | G      | G      | no      | G      | T      | C        | T           | C           | A           | C           | T           | no          | 3                       | G           | 9                | T           | G           | T           |
| CDC-Bold          | G           | C           | C           | G           | G           | T       | no         | T      | T      | no      | G      | T      | G      | G      | no      | G      | T      | C        | T           | C           | A           | C           | T           | no          | 3                       | G           | 9                | T           | G           | T           |
| Logan             | G           | C           | C           | G           | G           | T       | no         | T      | T      | no      | G      | T      | G      | G      | no      | G      | T      | C        | T           | C           | A           | C           | T           | no          | 3                       | G           | 9                | T           | G           | T           |
| Himalaya          | G           | C           | C           | G           | G           | T       | no         | T      | T      | no      | G      | T      | G      | G      | no      | G      | T      | C        | T           | C           | A           | C           | T           | no          | 3                       | G           | 9                | T           | G           | T           |
| Bowman            | G           | C           | C           | G           | G           | T       | no         | T      | T      | no      | G      | T      | G      | G      | no      | G      | T      | C        | T           | C           | A           | C           | T           | no          | 3                       | G           | 9                | T           | G           | T           |
| Morex             | G           | C           | C           | G           | G           | T       | no         | T      | T      | no      | G      | T      | G      | G      | no      | G      | C      | C        | T           | C           | A           | C           | T           | no          | 3                       | G           | 9                | T           | G           | T           |
| Steptoe           | A           | C           | A           | G           | C           | T       | no         | G      | T      | Δ14     | G      | C      | G      | G      | Δ2      | C      | T      | C        | C           | T           | G           | T           | C           | no          | 3                       | A           | 9                | T           | A           | C           |
| OUT329            | A           | C           | A           | G           | C           | A       | +          | G      | T      | Δ14     | G      | C      | G      | G      | Δ2      | C      | T      | C        | C           | T           | G           | T           | C           | no          | 3                       | A           | 9                | T           | A           | C           |
| TR251             | A           | C           | A           | G           | C           | T       | no         | G      | T      | Δ14     | G      | C      | G      | G      | Δ2      | C      | T      | C        | C           | T           | G           | T           | C           | no          | 3                       | A           | 9                | T           | A           | C           |
